# Supplementary material for: Long-Term Effects of Continuous Positive Airway Pressure Treatment on Sexuality in Female Patients with Obstructive Sleep Apnea
Source: PubMed Central journal article supplement — Sex Med. 2013 Nov 7;1(2):62–8. doi: 10.1002/sm2.18 (PMC4184499; doi:10.1002/sm2.18), 2013-11-07
Supplement: sm20001-0062-SD1.pdf [file sm20001-0062-SD1.pdf]

## The Female Sexual Functions Index.

This questionnaire concerns your sexual emotions and reactions during the last 4 weeks

| Question                                                                                                                                                      | Response Options                                                                                                                                                                                                   |
|---------------------------------------------------------------------------------------------------------------------------------------------------------------|--------------------------------------------------------------------------------------------------------------------------------------------------------------------------------------------------------------------|
| Q1: Over the past 4 weeks, how <b>often</b> did you feel sexual desire or interest?                                                                           | 5 = Almost always or always<br>4 = Most times (more than half the time)<br>3 = Sometimes (about half the time)<br>2 = A few times (less than half the time)<br>1 = Almost never or never                           |
| Q2: Over the past 4 weeks, how would you rate your <b>level</b> (degree) of sexual desire or interest?                                                        | 5 = Very high<br>4 = High<br>3 = Moderate<br>2 = Low<br>1 = Very low or none at all                                                                                                                                |
| Q3. Over the past 4 weeks, how <b>often</b> did you feel sexually aroused (“turned on”) during sexual activity or intercourse?                                | 0 = No sexual activity<br>5 = Almost always or always<br>4 = Most times (more than half the time)<br>3 = Sometimes (about half the time)<br>2 = A few times (less than half the time)<br>1 = Almost never or never |
| Q4. Over the past 4 weeks, how would you rate your <b>level</b> of sexual arousal (“turn on”) during sexual activity or intercourse?                          | 0 = No sexual activity<br>5 = Very high<br>4 = High<br>3 = Moderate<br>2 = Low<br>1 = Very low or none at all                                                                                                      |
| Q5. Over the past 4 weeks, how <b>confident</b> were you about becoming sexually aroused during sexual activity or intercourse?                               | 0 = No sexual activity<br>5 = Very high confidence<br>4 = High confidence<br>3 = Moderate confidence<br>2 = Low confidence<br>1 = Very low or no confidence                                                        |
| Q6. Over the past 4 weeks, how <b>often</b> have you been satisfied with your arousal (excitement) during sexual activity or intercourse?<br>Response Options | 0 = No sexual activity<br>5 = Almost always or always<br>4 = Most times (more than half the time)<br>3 = Sometimes (about half the time)<br>2 = A few times (less than half the time)<br>1 = Almost never or never |

| Question                                                                                                                                                   | Response Options                                                                                                                                                                                                                                                                                   |
|------------------------------------------------------------------------------------------------------------------------------------------------------------|----------------------------------------------------------------------------------------------------------------------------------------------------------------------------------------------------------------------------------------------------------------------------------------------------|
| Q7: Over the past 4 weeks, how <b>often</b> did you become lubricated ("wet") during sexual activity or intercourse?                                       | <ul style="list-style-type: none"> <li>0 = No sexual activity</li> <li>5 = Almost always or always</li> <li>4 = Most times (more than half the time)</li> <li>3 = Sometimes (about half the time)</li> <li>2 = A few times (less than half the time)</li> <li>1 = Almost never or never</li> </ul> |
| Q8. Over the past 4 weeks, how <b>difficult</b> was it to become lubricated ("wet") during sexual activity or intercourse?                                 | <ul style="list-style-type: none"> <li>0 = No sexual activity</li> <li>1 = Extremely difficult or impossible</li> <li>2 = Very difficult</li> <li>3 = Difficult</li> <li>4 = Slightly difficult</li> <li>5 = Not difficult</li> </ul>                                                              |
| Q9: Over the past 4 weeks, how often did you <b>maintain</b> your lubrication ("wetness") until completion of sexual activity or intercourse?              | <ul style="list-style-type: none"> <li>0 = No sexual activity</li> <li>5 = Almost always or always</li> <li>4 = Most times (more than half the time)</li> <li>3 = Sometimes (about half the time)</li> <li>2 = A few times (less than half the time)</li> <li>1 = Almost never or never</li> </ul> |
| Q10: Over the past 4 weeks, how <b>difficult</b> was it to maintain your lubrication ("wetness") until completion of sexual activity or intercourse?       | <ul style="list-style-type: none"> <li>0 = No sexual activity</li> <li>1 = Extremely difficult or impossible</li> <li>2 = Very difficult</li> <li>3 = Difficult</li> <li>4 = Slightly difficult</li> <li>5 = Not difficult</li> </ul>                                                              |
| Q11. Over the past 4 weeks, when you had sexual stimulation or intercourse, how <b>often</b> did you reach orgasm (climax)?                                | <ul style="list-style-type: none"> <li>0 = No sexual activity</li> <li>5 = Almost always or always</li> <li>4 = Most times (more than half the time)</li> <li>3 = Sometimes (about half the time)</li> <li>2 = A few times (less than half the time)</li> <li>1 = Almost never or never</li> </ul> |
| Q12: Over the past 4 weeks, when you had sexual stimulation or intercourse, how <b>difficult</b> was it for you to reach orgasm (climax)?                  | <ul style="list-style-type: none"> <li>0 = No sexual activity</li> <li>1 = Extremely difficult or impossible</li> <li>2 = Very difficult</li> <li>3 = Difficult</li> <li>4 = Slightly difficult</li> <li>5 = Not difficult</li> </ul>                                                              |
| Q13: Over the past 4 weeks, how <b>satisfied</b> were you with your ability to reach orgasm (climax) during sexual activity or intercourse?                | <ul style="list-style-type: none"> <li>0 = No sexual activity</li> <li>5 = Very satisfied</li> <li>4 = Moderately satisfied</li> <li>3 = About equally satisfied and dissatisfied</li> <li>2 = Moderately dissatisfied</li> <li>1 = Very dissatisfied</li> </ul>                                   |
| Q14: Over the past 4 weeks, how <b>satisfied</b> have you been with the amount of emotional closeness during sexual activity between you and your partner? | <ul style="list-style-type: none"> <li>0 = No sexual activity</li> <li>5 = Very satisfied</li> <li>4 = Moderately satisfied</li> <li>3 = About equally satisfied and dissatisfied</li> <li>2 = Moderately dissatisfied</li> <li>1 = Very dissatisfied</li> </ul>                                   |



Question

Response Options

Q15: Over the past 4 weeks, how satisfied have you been with your sexual relationship with your partner?

- 5 = Very satisfied
- 4 = Moderately satisfied
- 3 = About equally satisfied and dissatisfied
- 2 = Moderately dissatisfied
- 1 = Very dissatisfied

Q16: Over the past 4 weeks, how **satisfied** have you been with your overall sexual life?

- 5 = Very satisfied
- 4 = Moderately satisfied
- 3 = About equally satisfied and dissatisfied
- 2 = Moderately dissatisfied
- 1 = Very dissatisfied

Q17: Over the past 4 weeks, how **often** did you experience discomfort or pain during vaginal penetration?

- 0 = Did not attempt intercourse
- 1 = Almost always or always
- 2 = Most times (more than half the time)
- 3 = Sometimes (about half the time)
- 4 = A few times (less than half the time)
- 5 = Almost never or never

Q18: Over the past 4 weeks, how **often** did you experience discomfort or pain following vaginal penetration?

- 0 = Did not attempt intercourse
- 1 = Almost always or always
- 2 = Most times (more than half the time)
- 3 = Sometimes (about half the time)
- 4 = A few times (less than half the time)
- 5 = Almost never or never

Q19: Over the past 4 weeks, how would you rate your **level** (degree) of discomfort or pain during or following vaginal penetration?

- 0 = Did not attempt intercourse
- 1 = Very high
- 2 = High
- 3 = Moderate
- 4 = Low
- 5 = Very low or none at all
