# Supplementary material for: Long-Term Effects of Continuous Positive Airway Pressure Treatment on Sexuality in Female Patients with Obstructive Sleep Apnea
Source: PubMed Central journal article supplement — Sex Med. 2013 Nov 7;1(2):62–8. doi: 10.1002/sm2.18 (PMC4184499; doi:10.1002/sm2.18), 2013-11-07
Supplement: sm20001-0062-SD3.pdf [file sm20001-0062-SD3.pdf]

## The LISAT-11 Checklist

Here are a number of statements concerning how satisfied you are with different aspects of your life.

For each of these statements please mark a number from 1 to 6, where 1 means very dissatisfying and 6 very satisfying.

1= very dissatisfying, 2 = dissatisfying, 3 = rather dissatisfying

4 = rather satisfying, 5 = satisfying, 6 = very satisfying

|                            |   |   |   |   |   |   |
|----------------------------|---|---|---|---|---|---|
| My life as a whole is      | 1 | 2 | 3 | 4 | 5 | 6 |
| My sexual life is          | 1 | 2 | 3 | 4 | 5 | 6 |
| My family life is          | 1 | 2 | 3 | 4 | 5 | 6 |
| My partner relationship is | 1 | 2 | 3 | 4 | 5 | 6 |

Fugl-Meyer *et al.*, J Rehabil Med 2002;34:239-246.

*Modified after personal communication the author Fugl-Meyer, A.*
